1 **Structural Basis for Membrane Recruitment of ATG16L1 by WIPI2 in Autophagy**

2

3 Lisa M. Strong<sup>1,2,4</sup>, Chunmei Chang<sup>1,2,4</sup>, C. Alexander Boecker<sup>3,4</sup>, Thomas G. Flower<sup>1,2,4,6</sup>,  
4 Cosmo Z. Buffalo<sup>1,2,4</sup>, Xuefeng Ren<sup>1,2,4</sup>, Andrea K. H. Stavoe<sup>5</sup>, Erika L. F. Holzbaur<sup>3,4</sup> and James  
5 H. Hurley<sup>1,2,4,\*</sup>

6

7 <sup>1</sup> Department of Molecular and Cell Biology, University of California, Berkeley, Berkeley, CA.

8 <sup>2</sup> California Institute for Quantitative Biosciences, University of California, Berkeley, Berkeley,  
9 CA.

10 <sup>3</sup> Department of Physiology, University of Pennsylvania Perelman School of Medicine,  
11 Philadelphia, Pennsylvania 19104, USA

12 <sup>4</sup> Aligning Science Across Parkinson's (ASAP) Collaborative Research Network, Chevy Chase,  
13 MD, 20815.

14 <sup>5</sup> Department of Neurobiology and Anatomy, The University of Texas Health Science Center at  
15 Houston McGovern Medical School, Houston, TX, USA

16 <sup>6</sup> Present address: Galapagos, Romainville, France

17

18 \*Correspondence should be addressed to James Hurley ([jimhurley@berkeley.edu](mailto:jimhurley@berkeley.edu))

19

20

21 **ABSTRACT**

22 Autophagy is a cellular process that degrades cytoplasmic cargo by engulfing it in a double  
23 membrane vesicle, known as the autophagosome, and delivering it to the lysosome. The  
24 ATG12–5-16L1 complex is responsible for conjugating members of the ubiquitin-like ATG8  
25 protein family to phosphatidylethanolamine in the growing autophagosomal membrane, known  
26 as the phagophore. ATG12–5-16L1 is recruited to the phagophore by a subset of the  
27 phosphatidylinositol 3-phosphate-binding seven bladed  $\beta$ -propeller WIPI proteins. We  
28 determined the crystal structure of WIPI2d in complex with the WIPI2 interacting region (W2IR)  
29 of ATG16L1 comprising residues 207-230 at 1.85 Å resolution. The structure shows that the  
30 ATG16L1 W2IR adopts an alpha helical conformation and binds in an electropositive and  
31 hydrophobic groove between WIPI2  $\beta$ -propeller blades 2 and 3. Mutation of residues at the  
32 interface reduces or blocks the recruitment of ATG12–5-16L1 and the conjugation of the ATG8  
33 protein LC3B to synthetic membranes. Interface mutants show a decrease in starvation-induced  
34 autophagy. Comparisons across the four human WIPIs suggest that WIPI1 and 2 belong to a  
35 W2IR-binding subclass responsible for localizing ATG12–5-16L1 and driving ATG8 lipidation,  
36 whilst WIPI3 and 4 belong to a second W34IR-binding subclass responsible for localizing ATG2,  
37 and so directing lipid supply to the nascent phagophore. The structure provides a framework for  
38 understanding the regulatory node connecting two central events in autophagy initiation, the  
39 action of the autophagic PI 3-kinase complex on the one hand, and ATG8 lipidation on the  
40 other.

41

42

## 43 INTRODUCTION

44 Macroautophagy (hereafter autophagy) maintains cellular homeostasis by sequestering  
45 unneeded or harmful cytoplasmic material in double membrane vesicles known as  
46 autophagosomes (Morishita and Mizushima, 2019). Mature autophagosomes fuse with  
47 lysosomes, so degrading their contents. Starvation-induced autophagy is thought to target bulk  
48 cytosol, while various forms of selective autophagy target damaged mitochondria and other  
49 organelles, invading bacteria, protein aggregates, and many other intracellular materials  
50 (Anding and Baehrecke, 2017; Gomes and Dikic, 2014). Defects in autophagy are associated  
51 with increased vulnerability to pathogens, aging, and neurodegenerative diseases (Levine and  
52 Kroemer, 2019). Defects in the autophagy of mitochondria (“mitophagy”) downstream of Parkin  
53 and PINK1 are associated with hereditary early onset Parkinson’s Disease (Pickrell and Youle,  
54 2015; Stavoe and Holzbaur, 2019).

55         The many varieties of bulk and selective autophagy all rely on a handful of shared core  
56 components, which include the class III phosphatidylinositol 3-kinase complex I (PI3KC3-C1);  
57 the ubiquitin-like ATG8 family (LC3A-C, GABARAP, and GABARAPL1-2 in mammals); the  
58 proteins ATG7, ATG3, and ATG12–5-16L1 responsible for conjugating ATG8s to  
59 phosphatidylethanolamine (PE); and the WD-repeat protein interacting with phosphoinositide  
60 (WIPI family) (Chang et al., 2021a; Mizushima et al., 2011). PI3KC3-C1 is targeted to sites of  
61 autophagy initiation by its ATG14 subunit, where it phosphorylates phosphatidylinositol (PI) at  
62 the third position in the inositol ring to generate PI(3)P (Itakura et al., 2008; Obara et al., 2006;  
63 Sun et al., 2008). ATG8 proteins are attached to the membrane lipid phosphatidylethanolamine  
64 (PE) in a process that is closely analogous to the conjugation of ubiquitin to its target proteins  
65 (Ichimura et al., 2000). In brief, ATG4 cleaves ATG8 to expose the C-terminal glycine, the  
66 ubiquitin E1-like ATG7 then activates ATG8 for transfer to the ubiquitin E2-like ATG3, and the  
67 ATG12–5-16L1 complex scaffolds the ATG8 transfer from ATG3 to the headgroup of PE  
68 (Klionsky and Schulman, 2014). The function of ATG12-5-16L1 is analogous to that of ubiquitin  
69 E3 ligases, and we therefore refer to this complex here as “E3”. This process is often referred to  
70 as LC3 lipidation, after LC3, the founding member of the ATG8 family in mammals (Kabeya et  
71 al., 2000). In mammals, ATG8 conjugation to membranes is important for multiple steps in  
72 autophagy, and is particularly critical for autophagosome-lysosome fusion (Nguyen et al., 2016;  
73 Tsuboyama et al., 2016).

74         The two critical steps in autophagy initiation, PI 3-phosphorylation and LC3 lipidation,  
75 are connected to one another via a direct interaction between a subset of the PI(3)P-binding

76 WIPI proteins and ATG16L1 (Dooley et al., 2014). The human WIPI1-4 proteins comprise a  
77 subset of the seven bladed  $\beta$ -propeller protein binding to phosphoinositides (PROPPINs) (Dove  
78 et al., 2004). PROPPINs bind to PI(3)P and PI(3,5)P<sub>2</sub> headgroups through a conserved FRRG  
79 motif (Dove et al., 2004; Gaugel et al., 2012) and bind tightly, but reversibly, to membranes  
80 using a hydrophobic loop in blade 6 that inserts into the membrane (Baskaran et al., 2012; Krick  
81 et al., 2012; Watanabe et al., 2012). WIPI2 is expressed as six known isoforms, which appear to  
82 have overlapping functions (Proikas-Cezanne et al., 2015). WIPI2b in particular has been  
83 shown to have a central role in bulk and selective autophagy initiation in cells (Dooley et al.,  
84 2014; Polson et al., 2010), and WIPI2d potentially activated LC3 lipidation in an *in vitro* giant  
85 unilamellar vesicle (GUV) reconstituted system (Fracchiolla et al., 2020).

86         Despite the centrality of the WIPI2:ATG16L1 interaction to mammalian autophagy  
87 initiation, only a predictive model (Dooley et al., 2014), but no experimentally determined  
88 structure has been available. Here, we report the crystal structure of WIPI2d: ATG16L1 (207-  
89 230) complex at a 1.85 Å resolution. WIPI2d point mutations in the interface disrupted ATG16L1  
90 binding, reduced the ability of WIPI2 to recruit ATG12–5-16L1 and promote LC3 lipidation on  
91 GUVs, and reduced starvation-induced autophagy in cells.

92

## 93 RESULTS

### 94 Structure determination of WIPI2d:ATG16L1-W2IR

95 In order to generate a crystallizable form of WIPI2d, the flexible hydrophobic loop in blade 6 and  
96 the putatively disordered C-terminal region were deleted (Fig. 1A). The deletion construct  
97 removes the only regions whose sequence diverges between WIPI2b and WIPI2d, thus the  
98 construct represents a WIPI2b/d consensus. A peptide corresponding to the WIPI2-interacting  
99 region (“W2IR”) comprising residues 207-230 of ATG16L1 (Dooley et al., 2014) was  
100 synthesized. The crystal structure of the WIPI2d: ATG16L1 complex was determined at 1.85Å  
101 (Fig. 1B, C) by molecular replacement using the structure of *Kluyveromyces lactis* Hsv2  
102 (Baskaran et al., 2012) (PDB: 4EXV) as a search model. ATG16L1 was modelled *de novo* into  
103 the density (Fig. 1D). The asymmetric unit contains two copies of the WIPI2d: ATG16L1 W2IR  
104 complex. One WIPI2d monomer is bound to one ATG16L1 peptide, the two copies align with a  
105 C $\alpha$  root-mean-square deviation (RMSD) of 0.3 Å. Statistics of crystallographic data collection  
106 and structure refinement are provided in Supplementary Table 1. As expected on the basis of  
107 the Hsv2 (Baskaran et al., 2012; Krick et al., 2012; Watanabe et al., 2012) and WIPI3 (Ren et  
108 al., 2020) structures, WIPI2d folds into a seven blade  $\beta$ -propeller, with each blade containing  
109 four anti-parallel  $\beta$ -strands. The propeller is ~50 Å wide and ~30 Å tall (Fig. 1B, C). The FRRG  
110 motif that enables WIPI2d binding to phosphoinositides is distal to the ATG16L1 binding site.

111

### 112 Analysis of WIPI2d W2IR: ATG16L1 Interface

113 The ATG16L1 W2IR nestles between blades 2 and 3 of WIPI2d, burying ~550 Å<sup>2</sup> of solvent-  
114 accessible surface area. Blades 2 and 3 are identical in all six WIPI2 isoforms, thus, we expect  
115 that conclusions concerning the ATG16L1 binding mode drawn here will pertain to all WIPI2  
116 isoforms. The WIPI2d binding site for the ATG16L1 W2IR consists of a single deep groove with  
117 a mixed electropositive and hydrophobic character (Fig. 2A, C). Hydrophobic side chains of Leu  
118 64, Phe 65, Leu 69, Val 83, Ile 92, Cys 93, Ile 124, and Met 127 on WIPI2d contribute to the  
119 hydrophobic surface of the groove. The surfaces of Leu 220 and Leu 224 of the ATG16L1 W2IR  
120 are buried in this interface (Fig. 2C, D). The side-chains of WIPI2d His 85, Lys 88, Arg 108, and  
121 Lys 128 contribute to the electropositive character of the groove. The acidic side chains of Glu  
122 226 and Glu 230 of ATG16L1 interact with the electropositive patch on WIPI2 (Fig. 2E). The  
123 presence of WIPI2d Arg 108 and Arg 125, and ATG16L1 Glu 230 in the binding site was  
124 correctly predicted by the modeling efforts of Tooze and colleagues (Dooley et al., 2014). The  
125 nature of their interactions can now be defined on the basis of the crystal structure of the  
126 complex. Gln 217 of ATG16L1 forms a hydrogen bond with Lys 128 of WIPI2d at the N terminus

127 of the W2IR and WIPI2d, respectively. The C-terminus of the ATG16L1 W2IR, Glu 230 forms a  
128 salt bridge with Arg 108 of ATG16L1. Arg125 makes a water-mediated bridge to the W2IR  
129 peptide backbone in one of the two complexes in the asymmetric unit. Ser 66, Ser 67, and Ser  
130 68 contribute additional polar interactions. The backbone of ATG16L1 near Ala 227 and Ala  
131 228 forms a hydrogen bond with the backbone of WIPI2d between residues Ser 68 and Leu 69.  
132 This backbone binding favorably buries residues Leu 64, Phe 65, and Ser 67 within WIPI2d.

133

### 134 **Roles of WIPI2 interfacial residues**

135 To evaluate the role of specific residues at the interface, we introduced single site mutations into  
136 WIPI2d to disrupt binding. H85E, K88E, and C93E were designed to perturb the electropositive  
137 WIPI2d surface on blade 2 (Fig. 2B, 3A, B). L69E and I92E were designed to disrupt the  
138 hydrophobic groove for hydrophobic packing of ATG16L1 (Fig. 2D, 3A, B). K128E and R108E  
139 were chosen to abolish the interactions with Gln 217 and Glu 230 in ATG16L1, respectively  
140 (Fig. 2E, 3A, B). R125E was designed to disrupt the bridging interaction to Lys88 (Dooley et al.,  
141 2014). Both R108E and R125E were previously been shown to reduce binding within the  
142 cellular context, thus these two mutants also served to confirm that our *in vitro* binding  
143 experiments can replicate the findings of previously reported immunoprecipitations (Dooley et  
144 al., 2014). To investigate the complex formation of these mutants, we purified these mutants  
145 and performed a coprecipitation assay using immobilized GST-ATG16L1 W2IR (Fig. 3C, D). It  
146 was observed that L69E and C93E were prone to aggregation and were therefore not  
147 characterized further. All other mutants expressed at near identical levels as wild-type, were  
148 purified at equivalent yields, and so presumed not to have grossly perturbed structures and  
149 stabilities. H85E, K88E, and I92E completely abolished binding to ATG16L1 while R108E and  
150 R125E retained weak binding to ATG16L1 (Fig. 3D). Interestingly, K128E binds with similar  
151 affinity to WT WIPI2d (Fig. 3D). Lys128 is positioned within a flexible  $\beta$ -loop (Fig. 3A) near the  
152 location of three disordered Arg residues in the N-terminal part of the ATG16L1 W2IR preceding  
153 Gln 217. The resulting charge repulsion might offset the contribution of the W2IR Gln 217  
154 hydrogen bond. The presence of these apparent negative interactions suggests that the affinity  
155 of the wild-type complex has evolved to be moderate to facilitate the dissolution of the complex  
156 during the course of autophagosome maturation.

157

### 158 **The WIPI2d: ATG16L1 W2IR interface is required for LC3 lipidation *in vitro***

159 We next assessed the ability of WIPI2d mutants to activate E3 membrane recruitment and LC3  
160 lipidation in a microscopy-based GUV assay (Chang et al., 2021b; Fracchiolla et al., 2020). In the

161 presence of WIPI2d WT and the LC3 conjugation machinery (ATG7, ATG3, The ATG12–5-16L,  
162 and a mCherry-LC3B construct corresponding to the ATG4-processed form) (Fig. 4A), PI3KC3-  
163 C1 robustly triggered membrane recruitment of the E3-GFP complex and activated mCherry-  
164 LC3B lipidation (Fig. 4B, C). Consistent with expectation, mutation of the previously characterized  
165 ATG16L1 binding sites R108E and R125E significantly reduced E3 membrane binding and LC3  
166 lipidation (Fig. 4B, C). The mutants H85E and I92E almost completely abolished E3 membrane  
167 binding and LC3 lipidation (Fig. 4B, C). The K88E mutant also had an obvious defect in E3  
168 recruitment and LC3 lipidation (Fig. 4B, C). All of these observations are consistent with the loss  
169 of binding noted in the GST pull-down experiments. Consistent with the positive pull-down result,  
170 the K128E mutant fully retained the ability to recruit E3 to GUV membrane and activate  
171 subsequent LC3 lipidation (Fig. 4). These data confirm that the ATG16L1 binding interface on  
172 WIPI2d is responsible for the E3 recruitment and activation that promotes LC3 membrane  
173 conjugation.

174

#### 175 **Mutations that disrupt the WIPI2: ATG16L1 W2IR interface impair starvation-induced** 176 **autophagy**

177 Together, our structural observations and in vitro reconstitution experiments predict that mutations  
178 that disrupt the electrostatic interface between WIPI2 and ATG16L1 will disrupt autophagosome  
179 formation in vivo. To test this hypothesis, we engineered H85E, K88E, I92E, C93E, and K128E  
180 mutations into WIPI2B. We expressed Halo-tagged mutant constructs in parallel to WT WIPI2B  
181 in mouse embryonic fibroblasts (MEFs) depleted for endogenous WIPI2 by siRNA (Fig. 5A,B). In  
182 parallel, we also expressed the R108E mutation previously demonstrated by Dooley et al. (Dooley  
183 et al., 2014) to disrupt the WIPI2: ATG16L1 interaction. All mutants tested expressed at levels  
184 similar to WT (Fig. 5C). Autophagy was induced via a 2-hour incubation of the MEFs in starvation  
185 media (EBSS) in the presence of 100 nM Bafilomycin A (BafA). WIPI2 puncta formation was  
186 scored, with the lowest levels of puncta formation observed in cells expressing I92E or C93E (Fig.  
187 5D). As expected, none of the mutations abrogated the recruitment of WIPI2, but the lower  
188 numbers of WIPI2 puncta seen in cells expressing I92E or C93E may reflect a more transient  
189 localization of these mutant proteins to the omegasome (Fig. 5A). Next, we examined the  
190 formation of LC3-positive autophagosomes (Fig. 5A,E). Here, we found that every mutation  
191 except I92E induced a significant inhibition of autophagosome formation, with the most  
192 pronounced deficits seen upon expression of the C93E and R108E mutations; the H85E, K88E,  
193 and K128E mutants all showed similar deficits in autophagosome formation (Fig. 5E). Together  
194 with the structural and in vitro data described above, these cellular assays support the model that

195 the electrostatic interface between WIPI2 and ATG16L1 mediates efficient autophagosome  
196 formation. However, the observation that autophagy is inhibited but not abrogated upon  
197 expression of these mutants suggests that multiple combinatorial interactions facilitate the  
198 assembly and function of the complex autophagosome biogenesis machinery in cells, reflecting  
199 a relatively robust mechanism for autophagosome formation.

200

### 201 ***In vitro* reconstitution of WIPI2 membrane recruitment**

202 The finding that certain WIPI2 mutants had reduced membrane recruitment led us to examine  
203 whether WIPI2 recruitment to GUV membranes was perturbed by the W2IR binding site  
204 mutations. A minimal system including PI3KC3-C1 and E3 was used to explore the possibility  
205 that even in the presence of PI(3)P, E3 binding might contribute to WIPI2 recruitment. K88E,  
206 R108E, and R125E decreased WIPI2 recruitment to a significant extent (Fig. 6A, B), while other  
207 mutants did not.

208

### 209 **Comparison across the WIPI protein family**

210 The structure reported here was based on a construct corresponding to a consensus of the  
211 WIPI2b/d sequences for blades 1-7, since the C-terminal extension, the only region of  
212 divergence between the two proteins was deleted. These are the two WIPI2 isoforms that have  
213 been previously shown to bind ATG16L1 in immunoprecipitations from cells (Dooley et al.,  
214 2014). While the remaining WIPI isoforms diverge from the 2b/d consensus in blade 1, their  
215 sequences are identical in the blades 2 and 3 involved in ATG16L1 binding site. To the extent  
216 that these other isoforms were reported not to bind ATG16L1, these differences cannot be  
217 inherent in the W2IR binding groove itself, but rather must reflect other differences in the cellular  
218 context and modifications.

219 The only other human WIPI for which a structure is known is that of WIPI3 (Liang et al.,  
220 2019; Ren et al., 2020). WIPI3 interacts with the lipid transporter ATG2A (Ren et al., 2020) via  
221 what is believed to be a conserved binding site also present in WIPI4. WIPI4 is responsible for  
222 recruiting the phospholipid conduit ATG2A to sites of phagophore initiation, where it promotes  
223 tethering of the nascent phagophore to the ER membrane source (Chowdhury et al., 2018;  
224 Zheng et al., 2017). The structure of WIPI3 is superimposable on that of WIPI2d with a C $\alpha$   
225 r.m.s.d. of 1.2 Å (Fig. 7A, B).

226

## 227 **DISCUSSION**



228 WIPI2 is the linchpin of the circuit that connects two of the key reactions in autophagy initiation,  
229 the synthesis of PI(3)P by PI3KC3-C1, and LC3 lipidation by ATG12–5-16L1. The WIPI2-  
230 ATG16L1 interaction is essential for starvation-induced bulk autophagy and xenophagy (Dooley  
231 et al., 2014), and for efficient LC3 lipidation in a reconstituted system with physiologically  
232 reasonable nanomolar concentrations of autophagy core complexes (Fracchiolla et al., 2020).  
233 From the perspective of therapeutic restoration of autophagic function in aging and  
234 neurodegeneration, ectopic expression of WIPI2b restores a normal rate of autophagosome  
235 biogenesis in aged neurons (Stavoe et al., 2019). Here, we report the high resolution crystal  
236 structure of human WIPI2 and show how its unique electropositive and hydrophobic groove  
237 between blades 2 and 3 binds to the ATG16L1 W2IR.

238         The functional relevance of the groove residues was investigated by *in vitro* LC3  
239 lipidation assays and by LC3 puncta formation in starvation induced autophagy. All but one of  
240 the binding site mutants, K128E, reduced *in vitro* binding as judged by pull down assays of  
241 purified proteins. WIPI2 activation of LC3 lipidation of GUV membranes by ATG2-5-16L1  
242 precisely mirrored the results of the pull-down assays, with K128E again being the only mutant  
243 exhibiting no reduction. *In vivo* LC3 puncta formation was also reduced by most of the mutants,  
244 although the pattern did not follow the same rank order as the *in vitro* results. We interpret these  
245 data as confirmation that the W2IR binding site is important for LC3 lipidation *in vivo*, but that  
246 the many additional autophagy initiation components present in cells still modulate the effects in  
247 subtle ways. In a simple linear paradigm of autophagy initiation, PI(3)P generated by PI3KC3-  
248 C1 recruits WIPI2, which in turn recruits E3 to catalyze LC3 lipidation. In this model, mutations  
249 that perturb the E3 binding of WIPI2 would not be expected to alter the recruitment of WIPI2  
250 itself. However, at least one other upstream component, FIP200 (Fujita et al., 2013; Gammoh et  
251 al., 2013; Nishimura et al., 2013 ), contributes to E3 recruitment, and ATG16L1 has inherent  
252 membrane binding of its own (Lystad et al., 2019). Thus the presence of E3 can stabilize WIPI2  
253 on membranes in cells, a finding bolstered by our observation of the same effect *in vitro*.

254         Remarkably, the binding site for ATG2A is between blades 2 and 3 of WIPI3, the same  
255 two blades involved in binding ATG16L1 by WIPI2 (Fig. 7C, D). Despite the overall close  
256 similarity in the folds of the two WIPIs, the detailed structure of the blade 2-3 groove is quite  
257 divergent, explaining why WIPI3 does not bind ATG16L1, and WIPI2 does not bind to ATG2A.  
258 The Val- and Pro-rich ATG2A sequence that binds to WIPI3 in an extended conformation (Ren  
259 et al., 2020), and presumably WIPI4, is completely different in character from the Leu- and Glu-  
260 rich helical W2IR of ATG16L1. We propose the term WIPI3/4 interacting region (W34IR) for the  
261 ATG2A binding motif to contrast it with the distinct W2IR of ATG16L1. The ATG2A binding

262 groove of WIPI3 is electrostatically neutral, as compared to the electropositive groove in WIPI2.  
263 A subset of the essential W2IR binding residues of WIPI2 (Fig. 7, white squares) are altered in  
264 WIPI3. For example, the critical His 85 of WIPI2 is replaced by Asp in WIPI3. Expanding the  
265 analysis to WIPI1 and 4, the main features of the WIPI2 ATG16L1 binding groove are preserved  
266 in WIPI1 but not WIPI4 (Fig. 8). Conversely, the ATG2A binding groove of WIPI3 is preserved in  
267 WIPI4 but not WIPI1 (Fig. 8). Thus, the structural findings are consistent with the concept that  
268 the four human WIPIs can be subclassified into two groups (Polson *et al.*, 2010): an ATG16L1-  
269 binding WIPI1/2 group and an ATG2A-binding WIPI3/4 group.

270 Whilst WIPI-based recruitment of ATG16L1 is critical for autophagy, a number of other  
271 factors are also involved. FIP200 can recruit ATG16L1 to sites of phagophore initiation (Fujita *et al.*,  
272 2013; Gammoh *et al.*, 2013; Nishimura *et al.*, 2013 ) via the central region of ATG16L1 that  
273 centers on residues 239-246 (Fujita *et al.*, 2013) and so adjoins with the WIPI2 binding site.  
274 Binding to FIP200 alone in the absence of WIPI2 binding does not support autophagy induction  
275 (Dooley *et al.*, 2014), and the nature of the interplay between FIP200 and WIPI2 binding to the  
276 ATG16L1 central region will be important to clarify. The Golgi-resident RAB33B also binds to  
277 ATG16L1 (Itoh *et al.*, 2008), although the precise role of this interaction in autophagy is unclear.  
278 The RAB33B interaction was recently mapped structurally (Metje-Sprink *et al.*, 2020), and the  
279 RAB33B binding site was found to terminate at ATG16L1 residue 210, just N-terminal to the first  
280 ordered residues in the W2IR. In principle, it seems possible that RAB33B, FIP200, and WIPI2  
281 might be capable of binding simultaneously.

282 Orienting WIPI2d membrane in the edge-on geometry proposed on the basis of previous  
283 studies (Baskaran *et al.*, 2012; Krick *et al.*, 2012), the N-terminus of the W2IR projects in the  
284 direction opposite to the membrane (Fig. 9). This potentially positions the ATG16L1 coiled coil  
285 to project away from the PI(3)P-containing membrane to which WIPI2 is bound. One model is  
286 that ATG16L1 could conjugate LC3 to the nascent phagophore in *trans* whilst anchored to a  
287 PI(3)P-containing domain of the ER (Dooley *et al.*, 2014). *In vitro*, however, it is possible for  
288 WIPI2 to efficiently stimulate LC3 lipidation PI(3)P containing membranes in *cis* (Fracchiolla *et al.*,  
289 2020). Given the possibility that the ATG16L1 coiled coil can pivot with respect to the W2IR,  
290 these structural data on their own do not rule *cis* or *trans* LC3 lipidation in or out. Additional  
291 structures of ATG16L1 as assembled with multiple regulators, in the context of the full ATG12–  
292 5-16L1 complex, and in the context of membranes, will be required to answer this question. The  
293 high resolution structure presented here will be an important component for the interpretation of  
294 the larger scale, yet likely lower resolution, structures of assemblies yet to be solved.

295

## 296 **MATERIALS AND METHODS**

### 297 **Plasmids**

298 WIPI2d crystallography constructs and mutants were sub-cloned from a plasmid from a previous  
299 study(Fracchiolla et al., 2020) into the pCAG vector using restriction enzyme cloning. Mcherry  
300 constructs were cloned similarly with an N-terminal mcherry tag. All constructs had a C-terminal  
301 TEV cleavage site followed by TwinStrep tags.

### 302 **Protein expression and purification**

303 Purification of WIPI2d constructs used for crystallization, pull-down assays, and GUV assays  
304 were expressed in HEK GnTi cells. Constructs were transfected to cells using polyethylenimine  
305 (Polysciences). After 60 h of expression, cells were harvested and lysed with lysis buffer (50  
306 mM Hepes, pH 7.4, 1% Triton X-100, 300 mM NaCl, and 1 mM tris(2-carboxyethyl)phosphine  
307 [TCEP]) supplemented with EDTA-free protease inhibitors (Roche). The lysate was clarified by  
308 centrifugation (17,000 rpm for 1 h at 4°C) and incubated with StrepTactin Sepharose resin (IBA)  
309 for 2 h at 4°C, applied to a gravity column, and washed extensively with wash buffer (50 mM  
310 Hepes, pH 7.4, 300 mM NaCl, and 1 mM TCEP). The protein complexes were eluted with wash  
311 buffer containing 10 mM desthiobiotin (Sigma) and treated with TEV protease at 4°C overnight.  
312 Cleaved protein was applied to a Superdex 200 column (16/60 prep grade) equilibrated with gel  
313 filtration buffer (25 mM Hepes, pH 7.4, 150 mM NaCl, and 1 mM TCEP). Peak fractions were  
314 collected, pooled, snap frozen in liquid nitrogen, and stored at -80°C. Purification of ATG12–5-  
315 16, PI3KC3-C1, ATG7, ATG3, and LC3 used for GUV assays were performed as previously  
316 described(Fracchiolla et al., 2020).

### 317 **Crystallization and Structural Determination**

318 WIPI2d10-364 $\Delta$ 263-295: ATG16L1 (207-230) complex was formed overnight with 5X molar  
319 excess peptide (GenScript). Crystals of the complex were grown using hanging drop vapor  
320 diffusion method at 4°C. 1 $\mu$ L of the protein complex (2 mg/mL) was mixed with 1  $\mu$ L reservoir  
321 solution and 0.3  $\mu$ L of a crystal seed stock. This was suspended over a 500  $\mu$ L reservoir of 22%  
322 w/v PEG 3,350 (Hampton Research), 2% v/v Tacsimate pH 7.0 (Molecular Dimension), and  
323 100mM Hepes pH 7.7. Crystals appeared within 2 days and were continued to grow for  
324 approximately a week. Crystals were cryoprotected in reservoir solution supplemented with 25%  
325 (v/v) glycerol. A native dataset was collected from a single crystal under cryogenic conditions  
326 (100°K) at a wavelength of 0.979Å using a Dectris PILATUS 6M/EIGER 16M detector (beamline  
327 BL12-2, SSRL). The data was indexed and integrated using LABELIT and XDS(Kabsch, 2010).  
328 Integrated reflections were scaled, merged, and truncated using AIMLESS and TRUNCATE,  
329 respectively. Initial phases were determined by molecular replacement with the program

330 PHASER(McCoy et al., 2007) using KIHsv2 (PDB: 4EXV)(Baskaran et al., 2012) as a search  
331 model. ATG16L1 peptide was manually modeled into the structure according to the 2Fo-Fc and  
332 Fo-Fc electron density maps using Coot(Emsley et al., 2010). Iterative rounds of manual model  
333 building and refinement were performed using Coot(Emsley et al., 2010) and Phenix  
334 Refine(Afonine et al., 2012) respectively. Data collection and refinement statistics are listed in  
335 Supplementary Table 1. WIPI2 ATG16L1 interface was analyzed using PDBePISA(Krissinel and  
336 Henrick, 2007). All figures were generated with PyMol (<http://www.pymol.org>). The electrostatic  
337 surface was calculated using APBS(Baker et al., 2001) in PyMOL. Hydrophobic surface was  
338 generated using YBR script in PyMOL(Hagemans et al., 2015). WIPI1 and WIPI4 homology  
339 models were generated in SWISS-Model(Bertoni et al., 2017; Bienert et al., 2017; Studer et al.,  
340 2020; Studer et al., 2021; Waterhouse et al., 2018) using WIPI2d10-364 $\Delta$ 263-295 and WIPI3  
341 (PDB: 6KLR) as templates, respectively.

#### 342 **Coprecipitation Assay**

343 10  $\mu$ M purified WIPI2d was mixed with 20  $\mu$ M of GST or GST-ATG16L1(207-230) and 10  $\mu$ L  
344 Glutathione Sepharose 4B (GE Healthcare). The final buffer was 25mM HEPES pH 7.4, 150mM  
345 NaCl, 1mM TCEP. The final volume was 150  $\mu$ L. The system was gently rocked at 4°C for 2  
346 hours before washing the protein-bound resin three times. Loading dye was added to the beads  
347 and bands were visualized using SDS-PAGE gel after coomassie staining.

#### 348 **GUV Assay**

349 GUVs were prepared by hydrogel-assisted swelling as described previously (Chang et al, 2021).  
350 The reactions were set up in an eight-well observation chamber (Lab Tek) that pre-coated with 5  
351 mg/ml  $\beta$  casein for 30 min. For E3 membrane recruitment and LC3 lipidation assay, a final  
352 concentration of 50 nM PI3KC3-C1 complex, 250 nM WIPI2d or mutant proteins, 50 nM E3-GFP  
353 complex, 100 nM ATG7, 100 nM ATG3, 500 nM mCherry-LC3B, 50  $\mu$ M ATP, and 2 mM MnCl<sub>2</sub>  
354 were used. For WIPI2d membrane binding assay, a final concentration of 50 nM PI3KC3-C1, 400  
355 nM mCherry-WIPI2d or mutant proteins, 50 nM E3-GFP complex were used. A final volume of  
356 120  $\mu$ L mixture was made for all the reactions. 10  $\mu$ L GUVs were added to initiate the reaction.  
357 After 5 min incubation, during which random views were picked for imaging, time-lapse images  
358 were acquired in multitracking mode on a Nikon A1 confocal microscope with a 63  $\times$  Plan  
359 Apochromat 1.4 NA objective. Three biological replicates were performed for each experimental  
360 condition. Identical laser power and gain settings were used during the course of all conditions.

361 For quantification of protein intensity on GUV membranes, the outline of individual vesicle  
362 was manually defined based on the membrane channel. The intensity threshold was calculated  
363 by the average intensities of pixels inside and outside of the bead and then intensity

364 measurements of individual bead were obtained. Averages and standard deviations were  
365 calculated among the measured values per each condition and plotted in a bar graph. The data  
366 were analysed with GraphPad Prism 9 by using one-way ANOVA with Dunn's multiple  
367 comparisons test.

### 368 **Starvation assay in MEFs**

369 Wild-type SV40 immortalized MEFs were purchased from ATCC (CRL-2907) and cultured in  
370 DMEM (Corning) supplemented with 10% FBS. MEFs were plated on 35 mm glass bottom  
371 imaging dishes (MatTek) and on the following day transfected with 50 pmol ON-TARGETplus  
372 SMARTPool WIPI2 siRNA (Horizon) using RNAiMAX. After 24 hours, media was exchanged to  
373 fresh media and cells were transfected with 50 pmol WIPI2 siRNA and 0.75 µg of each Halo-  
374 WIPI2 construct using Lipofectamine 2000. 48 hours after Lipofectamine 2000 transfection, MEFs  
375 were starved in EBSS (Thermo Fisher) containing 100 nM bafilomycin A1 and 37.5 nM TMRDirect  
376 Halo Ligand (Promega). After 2 hours in EBSS, MEFs were fixed and permeabilized for 8 minutes  
377 at -20°C using ice-cold methanol. Cells were washed three times with PBS and blocked for 1 hour  
378 with 5% goat serum and 1% BSA in PBS. MEFs were then incubated with anti-LC3 primary  
379 antibody (Abcam) diluted in blocking solution for 1 hour at RT, washed three times with PBS, and  
380 incubated with anti-rabbit AlexaFluor488 secondary antibody for 1 hour at RT. After three washes  
381 with PBS and nuclear counterstaining with Hoechst (Thermo Fisher), MEFs were imaged in PBS  
382 on a Perkin Elmer spinning disk confocal setup with a Nikon Eclipse Ti inverted microscope, a  
383 Hamamatsu EMCCD 9100-50 camera, and an Aplanachromat 100x 1.49 NA oil immersion objective.  
384 Images were acquired as z stacks with a 200 nm step-size.

385 Z-stacks were assembled into maximal projections and channels were split using FIJI  
386 (NIH). Images from each condition across two biological replicates were used to train Ilastik to  
387 identify LC3 puncta. Images across three biological replicates (a unique passage of MEFs was  
388 considered a biological replicate) were used to train Ilastik to identify WIPI2 puncta after  
389 processing to normalize WIPI2 expression in FIJI. Training images were not used in subsequent  
390 data analysis. Fifteen images from each experiment for each condition were processed in batch  
391 mode by Ilastik to yield simple segmentation files. Using the WIPI2 channel, cell outlines were  
392 drawn by hand and saved as ROIs in FIJI. LC3 and WIPI2 puncta were counted within resulting  
393 ROIs using Analyze Particles in FIJI. For LC3 puncta, size was set 0-Infinity; for WIPI2 puncta,  
394 size was set 5-Infinity (square pixels). Results were tabulated in Microsoft Excel; graphing and  
395 statistical tests were performed using GraphPad Prism 9. Superplots were generated as  
396 discussed in Lord et al., 2020. One-way ANOVAs were performed on the averages for the

397 biological replicates; Tukey's multiple comparisons test was used post-hoc to compare WIPI2  
398 point mutants to WT controls.

399

#### 400 **Data Availability**

401 Coordinates and structure factors have been deposited in the Protein Data Bank under  
402 accession code PDB 7MU2. Protocols will be deposited in protocols.io. Plasmids developed for  
403 this study will be deposited at Addgene.org. Other materials will be provided upon request to the  
404 corresponding author.

405

#### 406 **ACKNOWLEDGEMENTS**

407 We thank members of the Hurley and Holzbaaur labs, Sascha Martens, Michael Lazarou and  
408 members of their laboratories, Dorotea Fracchiolla, and others in Aligning Science Across  
409 Parkinson's Team mito911 for advice and discussions. We thank Clyde Smith and Lisa Dunn at  
410 SSRL beamline BL12-2 for assistance with data collection. The study is funded by the joint  
411 efforts of The Michael J. Fox Foundation for Parkinson's Research (MJFF) and Aligning Science  
412 Across Parkinson's (ASAP) initiative. MJFF administers the grant ASAP-000350 (to J.H.H. and  
413 E.H.) on behalf of ASAP and itself. C.A.B. was supported by the German Research Foundation  
414 (DFG; BO 5434/1-1). The research was also supported by National Institute of General Medical  
415 Sciences, NIH, R01 GM111730 (J.H.H.) and National Institute of Neurological Disease and  
416 Stroke, NIH, R00 NS109286 (A.K.H.S). Use of the Stanford Synchrotron Radiation Lightsource,  
417 SLAC National Accelerator Laboratory, is supported by the U.S. Department of Energy, Office of  
418 Science, Office of Basic Energy Sciences under Contract No. DE-AC02-76SF00515. The SSRL  
419 Structural Molecular Biology Program is supported by the DOE Office of Biological and  
420 Environmental Research, and by the National Institutes of Health, National Institute of General

421 Medical Sciences (P30GM133894). The contents of this publication are solely the responsibility  
422 of the authors and do not necessarily represent the official views of NIGMS or NIH.

423

424 **CONTRIBUTIONS**

425 L.S., C.C., C.A.B., A.S., C.Z.B., and T.G.F. performed research. L.S. and J.H. conceptualized  
426 research. E.H. and J.H. supervised research. L. S. and J. H. wrote the first draft of the  
427 manuscript. All authors commented upon the final draft of the manuscript.

428

429 **Competing interest statement:**

430 J.H.H. is a cofounder of Casma Therapeutics. The authors declare no other competing  
431 interests.

432

433 **REFERENCES**

- 434 Afonine, P.V., R.W. Grosse-Kunstleve, N. Echols, J.J. Headd, N.W. Moriarty, M.  
435 Mustyakimov, T.C. Terwilliger, A. Urzhumtsev, P.H. Zwart, and P.D. Adams.  
436 2012. Towards automated crystallographic structure refinement with  
437 phenix.refine. *Acta Crystallogr D Biol Crystallogr*. 68:352-367.
- 438 Anding, A.L., and E.H. Baehrecke. 2017. Cleaning House: Selective Autophagy of  
439 Organelles. *Dev Cell*. 41:10-22.
- 440 Baker, N.A., D. Sept, S. Joseph, M.J. Holst, and J.A. McCammon. 2001. Electrostatics  
441 of nanosystems: application to microtubules and the ribosome. *Proc Natl Acad  
442 Sci U S A*. 98:10037-10041.
- 443 Baskaran, S., M.J. Ragusa, E. Boura, and J.H. Hurley. 2012. Two-site recognition of  
444 phosphatidylinositol 3-phosphate by PROPPINs in autophagy. *Mol Cell*. 47:339-  
445 348.
- 446 Bertoni, M., F. Kiefer, M. Biasini, L. Bordoli, and T. Schwede. 2017. Modeling protein  
447 quaternary structure of homo- and hetero-oligomers beyond binary interactions  
448 by homology. *Scientific Reports*. 7.
- 449 Bienert, S., A. Waterhouse, D. Beer, P., A., Tjaart, G. Tauriello, G. Studer, L. Bordoli,  
450 and T. Schwede. 2017. The SWISS-MODEL Repository—new features and  
451 functionality. *Nucleic Acids Research*. 45:D313-D319.
- 452 Chang, C., L.E. Jensen, and J.H. Hurley. 2021a. Autophagosome biogenesis comes out  
453 of the black box. *Nat Cell Biol*.
- 454 Chang, C., X. Shi, L.E. Jensen, A.L. Yokom, D. Fracchiolla, S. Martens, and J.H.  
455 Hurley. 2021b. Reconstitution of cargo-induced LC3 lipidation in mammalian  
456 selective autophagy. *bioRxiv*. 10.1101/2021.01.08.425958.
- 457 Chowdhury, S., C. Otomo, A. Leitner, K. Ohashi, R. Aebersold, G.C. Lander, and T.  
458 Otomo. 2018. Insights into autophagosome biogenesis from structural and  
459 biochemical analyses of the ATG2A-WIPI4 complex. *Proceedings of the National  
460 Academy of Sciences*. 115:E9792-E9801.
- 461 Dooley, H.C., M. Razi, H.E. Polson, S.E. Girardin, M.I. Wilson, and S.A. Tooze. 2014.  
462 WIPI2 links LC3 conjugation with PI3P, autophagosome formation, and pathogen  
463 clearance by recruiting Atg12-5-16L1. *Mol Cell*. 55:238-252.
- 464 Dove, S.K., R.C. Piper, R.K. Mcewen, J.W. Yu, M.C. King, D.C. Hughes, J. Thuring,  
465 A.B. Holmes, F.T. Cooke, R.H. Michell, P.J. Parker, and M.A. Lemmon. 2004.  
466 Svp1p defines a family of phosphatidylinositol 3,5-bisphosphate effectors. *The  
467 EMBO Journal*. 23:1922-1933.
- 468 Emsley, P., B. Lohkamp, W.G. Scott, and K. Cowtan. 2010. Features and development  
469 of Coot. *Acta Crystallogr D Biol Crystallogr*. 66:486-501.
- 470 Fracchiolla, D., C. Chang, J.H. Hurley, and S. Martens. 2020. A PI3K-WIPI2 positive  
471 feedback loop allosterically activates LC3 lipidation in autophagy. *J Cell Biol*.  
472 219.
- 473 Fujita, N., E. Morita, T. Itoh, A. Tanaka, M. Nakaoka, Y. Osada, T. Umemoto, T. Saitoh,  
474 H. Nakatogawa, S. Kobayashi, T. Haraguchi, J.L. Guan, K. Iwai, F. Tokunaga, K.  
475 Saito, K. Ishibashi, S. Akira, M. Fukuda, T. Noda, and T. Yoshimori. 2013.  
476 Recruitment of the autophagic machinery to endosomes during infection is  
477 mediated by ubiquitin. *Journal of Cell Biology*. 203:115-128.



- 478 Gammoh, N., O. Florey, M. Overholtzer, and X.J. Jiang. 2013. Interaction between  
479 FIP200 and ATG16L1 distinguishes ULK1 complex-dependent and -independent  
480 autophagy. *Nat. Struct. Mol. Biol.* 20:144-149.
- 481 Gaugel, A., D. Bakula, A. Hoffmann, and T. Proikas-Cezanne. 2012. Defining regulatory  
482 and phosphoinositide-binding sites in the human WIPI-1  $\beta$ -propeller responsible  
483 for autophagosomal membrane localization downstream of mTORC1 inhibition.  
484 *Journal of Molecular Signaling.* 7:16.
- 485 Gomes, L.C., and I. Dikic. 2014. Autophagy in antimicrobial immunity. *Mol Cell.* 54:224-  
486 233.
- 487 Hagemans, D., I.A. van Belzen, T. Moran Luengo, and S.G. Rudiger. 2015. A script to  
488 highlight hydrophobicity and charge on protein surfaces. *Front Mol Biosci.* 2:56.
- 489 Ichimura, Y., T. Kirisako, T. Takao, Y. Satomi, Y. Shimonishi, N. Ishihara, N. Mizushima,  
490 I. Tanida, E. Kominami, M. Ohsumi, T. Noda, and Y. Ohsumi. 2000. A ubiquitin-  
491 like system mediates protein lipidation. *Nature.* 408:488-492.
- 492 Itakura, E., C. Kishi, K. Inoue, and N. Mizushima. 2008. Beclin 1 forms two distinct  
493 phosphatidylinositol 3-kinase complexes with mammalian Atg14 and UVRAG.  
494 *Molecular Biology of the Cell.* 19:5360-5372.
- 495 Itoh, T., N. Fujita, E. Kanno, A. Yamamoto, T. Yoshimori, and M. Fukuda. 2008. Golgi-  
496 resident small GTPase Rab33B interacts with Atg16L and modulates  
497 autophagosome formation. *Mol Biol Cell.* 19:2916-2925.
- 498 Kabeya, Y., N. Mizushima, T. Ueno, A. Yamamoto, T. Kirisako, T. Noda, E. Kominami,  
499 Y. Ohsumi, and T. Yoshimori. 2000. LC3, a mammalian homologue of yeast  
500 Apg8p, is localized in autophagosome membranes after processing. *EMBO J.*  
501 19:5720-5728.
- 502 Kabsch, W. 2010. XDS. *Acta crystallographica. Section D, Biological crystallography.*  
503 66:125-132.
- 504 Klionsky, D.J., and B.A. Schulman. 2014. Dynamic regulation of macroautophagy by  
505 distinctive ubiquitin-like proteins. *Nat Struct Mol Biol.* 21:336-345.
- 506 Krick, R., R.A. Busse, A. Scacioc, M. Stephan, A. Janshoff, M. Thumm, and K. Kuhnel.  
507 2012. Structural and functional characterization of the two phosphoinositide  
508 binding sites of PROPPINs, a beta-propeller protein family. *Proc Natl Acad Sci U*  
509 *S A.* 109:E2042-2049.
- 510 Krissinel, E., and K. Henrick. 2007. Inference of Macromolecular Assemblies from  
511 Crystalline State. *Journal of Molecular Biology.* 372:774-797.
- 512 Levine, B., and G. Kroemer. 2019. Biological Functions of Autophagy Genes: A Disease  
513 Perspective. *Cell.* 176:11-42.
- 514 Liang, R., J. Ren, Y. Zhang, and W. Feng. 2019. Structural Conservation of the Two  
515 Phosphoinositide-Binding Sites in WIPI Proteins. *J Mol Biol.* 431:1494-1505.
- 516 Lystad, A.H., S.R. Carlsson, L.R. de la Ballina, K.J. Kauffman, S. Nag, T. Yoshimori,  
517 T.J. Melia, and A. Simonsen. 2019. Distinct functions of ATG16L1 isoforms in  
518 membrane binding and LC3B lipidation in autophagy-related processes. *Nat. Cell*  
519 *Biol.* 21:372-383.
- 520 McCoy, A.J., R.W. Grosse-Kunstleve, P.D. Adams, M.D. Winn, L.C. Storoni, and R.J.  
521 Read. 2007. Phaser crystallographic software. *J Appl Crystallogr.* 40:658-674.

- 522 Metje-Sprink, J., J. Groffmann, P. Neumann, B. Barg-Kues, R. Ficner, K. Kühnel, A.M.  
523 Schalk, and B. Binotti. 2020. Crystal structure of the Rab33B/Atg16L1 effector  
524 complex. *Sci Rep.* 10:12956.
- 525 Mizushima, N., T. Yoshimori, and Y. Ohsumi. 2011. The role of Atg proteins in  
526 autophagosome formation. *Annu Rev Cell Dev Biol.* 27:107-132.
- 527 Morishita, H., and N. Mizushima. 2019. Diverse Cellular Roles of Autophagy. *Annu Rev*  
528 *Cell Dev Biol.* 35:453-475.
- 529 Nguyen, T.N., B.S. Padman, J. Usher, V. Oorschot, G. Ramm, and M. Lazarou. 2016.  
530 Atg8 family LC3/GABARAP proteins are crucial for autophagosome-lysosome  
531 fusion but not autophagosome formation during PINK1/Parkin mitophagy and  
532 starvation. *J Cell Biol.* 215:857-874.
- 533 Nishimura, T., T. Kaizuka, K. Cadwell, M.H. Sahani, T. Saitoh, S. Akira, H.W. Virgin,  
534 and N. Mizushima. 2013. FIP200 regulates targeting of Atg16L1 to the isolation  
535 membrane. *EMBO Rep.* 14:284-291.
- 536 Obara, K., T. Sekito, and Y. Ohsumi. 2006. Assortment of phosphatidylinositol 3-kinase  
537 complexes-Atg14p directs association of complex I to the pre-autophagosomal  
538 structure in *Saccharomyces cerevisiae*. *Molecular Biology of the Cell.* 17:1527-  
539 1539.
- 540 Pickrell, A.M., and R.J. Youle. 2015. The Roles of PINK1, Parkin, and Mitochondrial  
541 Fidelity in Parkinson's Disease. *Neuron.* 85:257-273.
- 542 Polson, H.E., L.J. de, D.J. Rigden, M. Reedijk, S. Urbe, M.J. Clague, and S.A. Tooze.  
543 2010. Mammalian Atg18 (WIPI2) localizes to omegasome-anchored  
544 phagophores and positively regulates LC3 lipidation. *Autophagy.* 6.
- 545 Proikas-Cezanne, T., Z. Takacs, P. Donnes, and O. Kohlbacher. 2015. WIPI proteins:  
546 essential PtdIns3P effectors at the nascent autophagosome. *J Cell Sci.* 128:207-  
547 217.
- 548 Ren, J., R. Liang, W. Wang, D. Zhang, L. Yu, and W. Feng. 2020. Multi-site-mediated  
549 entwining of the linear WIR-motif around WIPI beta-propellers for autophagy. *Nat*  
550 *Commun.* 11:2702.
- 551 Stavoe, A.K., P.P. Gopal, A. Gubas, S.A. Tooze, and E.L. Holzbaur. 2019. Expression  
552 of WIPI2B counteracts age-related decline in autophagosome biogenesis in  
553 neurons. *Elife.* 8.
- 554 Stavoe, A.K.H., and E.L.F. Holzbaur. 2019. Autophagy in Neurons. *Annu Rev Cell Dev*  
555 *Biol.* 35:477-500.
- 556 Studer, G., C. Rempfer, A.M. Waterhouse, R. Gumienny, J. Haas, and T. Schwede.  
557 2020. QMEANDisCo—distance constraints applied on model quality estimation.  
558 *Bioinformatics.* 36:1765-1771.
- 559 Studer, G., G. Tauriello, S. Bienert, M. Biasini, N. Johnner, and T. Schwede. 2021.  
560 ProMod3—A versatile homology modelling toolbox. *PLOS Computational*  
561 *Biology.* 17:e1008667.
- 562 Sun, Q., W. Fan, K. Chen, X. Ding, S. Chen, and Q. Zhong. 2008. Identification of  
563 Barkor as a mammalian autophagy-specific factor for Beclin 1 and class III  
564 phosphatidylinositol 3-kinase. *Proc Natl Acad Sci U S A.* 105:19211-19216.
- 565 Tsuboyama, K., I. Koyama-Honda, Y. Sakamaki, M. Koike, H. Morishita, and N.  
566 Mizushima. 2016. The ATG conjugation systems are important for degradation of  
567 the inner autophagosomal membrane. *Science.* 354:1036-1041.

- 568 Watanabe, Y., T. Kobayashi, H. Yamamoto, H. Hoshida, R. Akada, F. Inagaki, Y.  
569 Ohsumi, and N.N. Noda. 2012. Structure-based Analyses Reveal Distinct Binding  
570 Sites for Atg2 and Phosphoinositides in Atg18. *Journal of Biological Chemistry*.  
571 287:31681-31690.
- 572 Waterhouse, A., M. Bertoni, S. Bienert, G. Studer, G. Tauriello, R. Gumienny, F.T. Heer,  
573 D. Beer, P. Tjaart A, C. Rempfer, L. Bordoli, R. Lepore, and T. Schwede. 2018.  
574 SWISS-MODEL: homology modelling of protein structures and complexes.  
575 *Nucleic Acids Research*. 46:W296-W303.
- 576 Zheng, J.X., Y. Li, Y.H. Ding, J.J. Liu, M.J. Zhang, M.Q. Dong, H.W. Wang, and L. Yu.  
577 2017. Architecture of the ATG2B-WDR45 complex and an aromatic Y/HF motif  
578 crucial for complex formation. *Autophagy*. 13:1870-1883.  
579

580 **Figure 1: WIPI2d: ATG16L1 W2IR Structure**

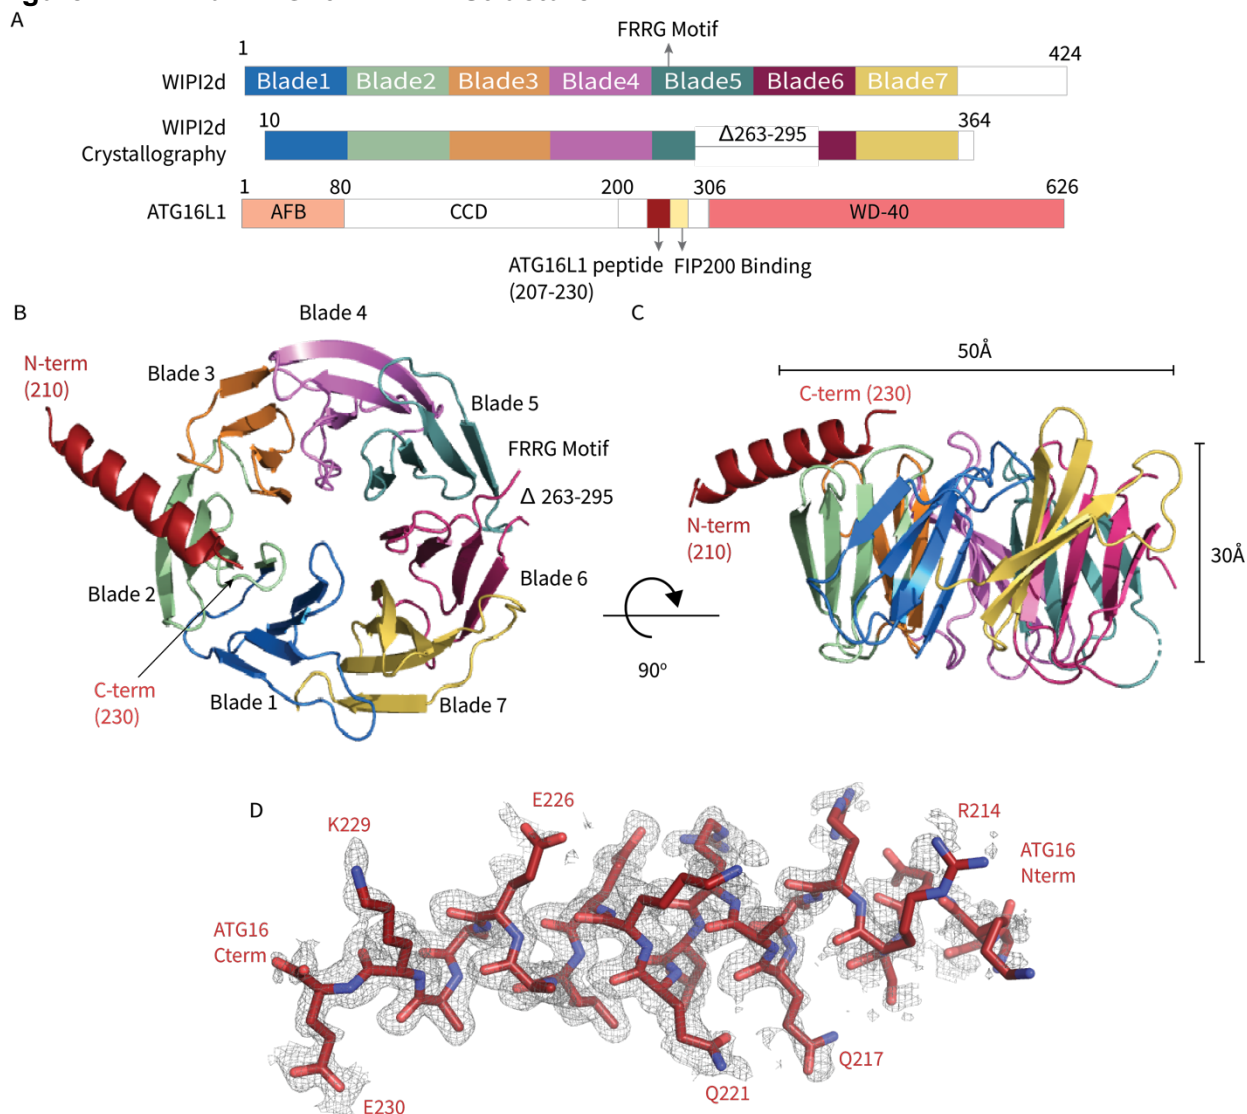

581  
 582 Figure 1: Structure of WIPI2d bound to ATG16L1 W2IR. A) Annotated WIPI2d and ATG16L1  
 583 domain schematics. WIPI2d construct for crystallography is shown and W2IR from ATG16L1. B-  
 584 C) The ribbon diagram of the WIPI2d complex with ATG16L1 W2IR from the B) bottom and C)  
 585 side views. Each blade is colored in accordance with A. D) Composite omit map of ATG16L1  
 586 W2IR. Modelled ATG16L1 is shown as red cartoon and the composite omit 2mFo-DFc map  
 587 contoured at 1σ is shown in grey.

588 **Figure 2: Interactions at the interface**

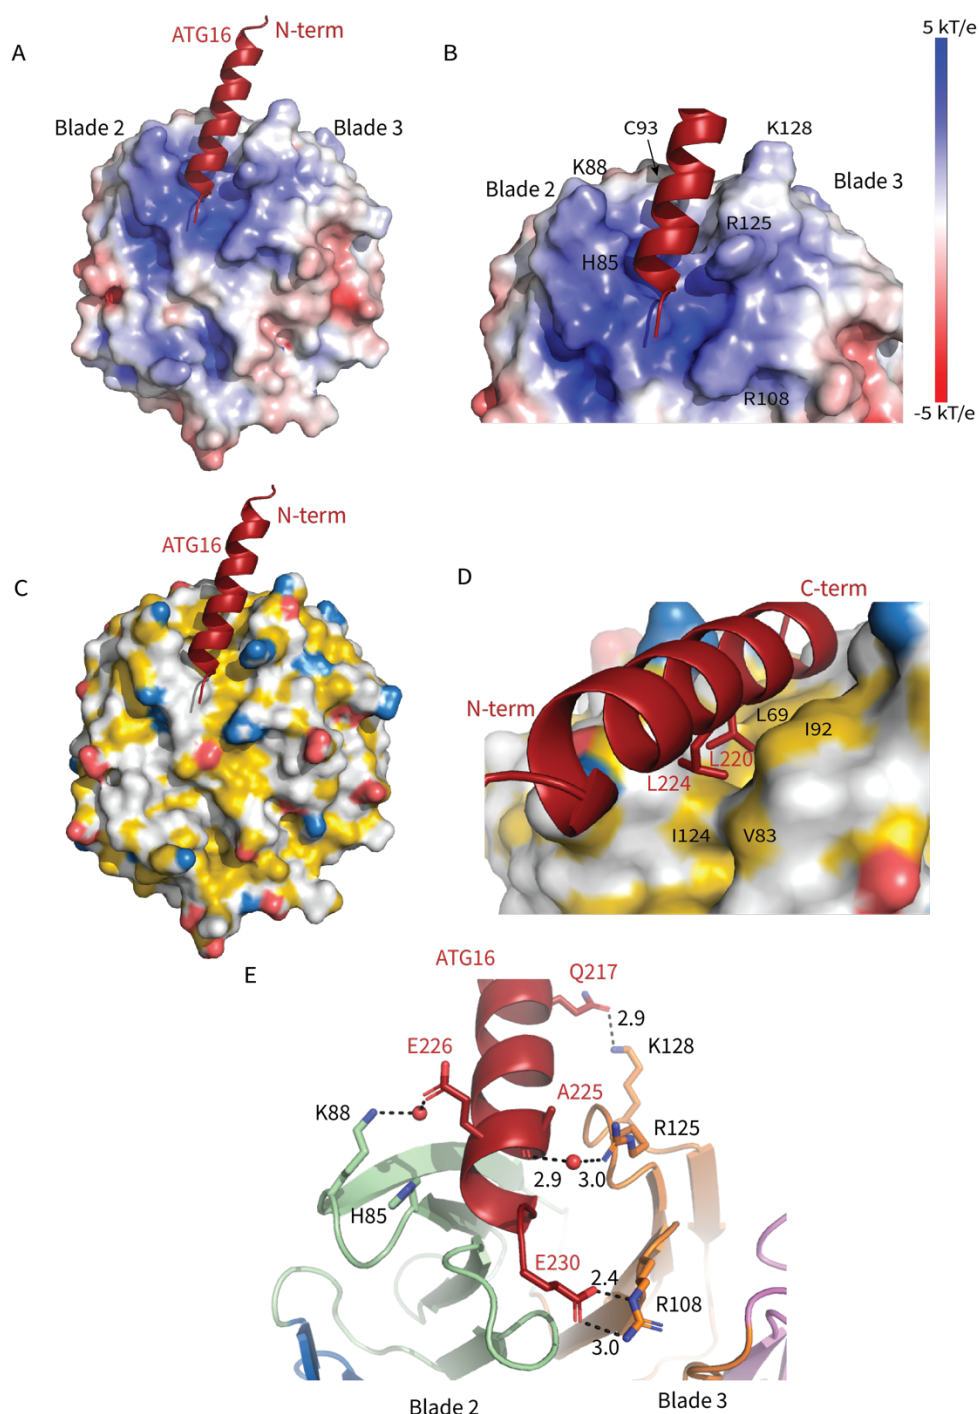

589  
590 Figure 2: Analysis of the Interface. A) Overall electrostatic surface and B) closer view of  
591 electrostatic surface with ATG16 W21R shown as a cartoon and key residues labelled. C)  
592 Overall hydrophobic surface of WIPI2d and D) closer view of the hydrophobic interface with key  
593 residues labelled where yellow represents hydrophobic regions. E) A cartoon and stick  
594 representation of hydrogen bonds between ATG16 and WIPI2d shown as black dotted lines with  
595 distances noted and key residues shown as sticks.

596 **Figure 3: WIPI2d Interfacial mutants decrease ATG16L1 binding**

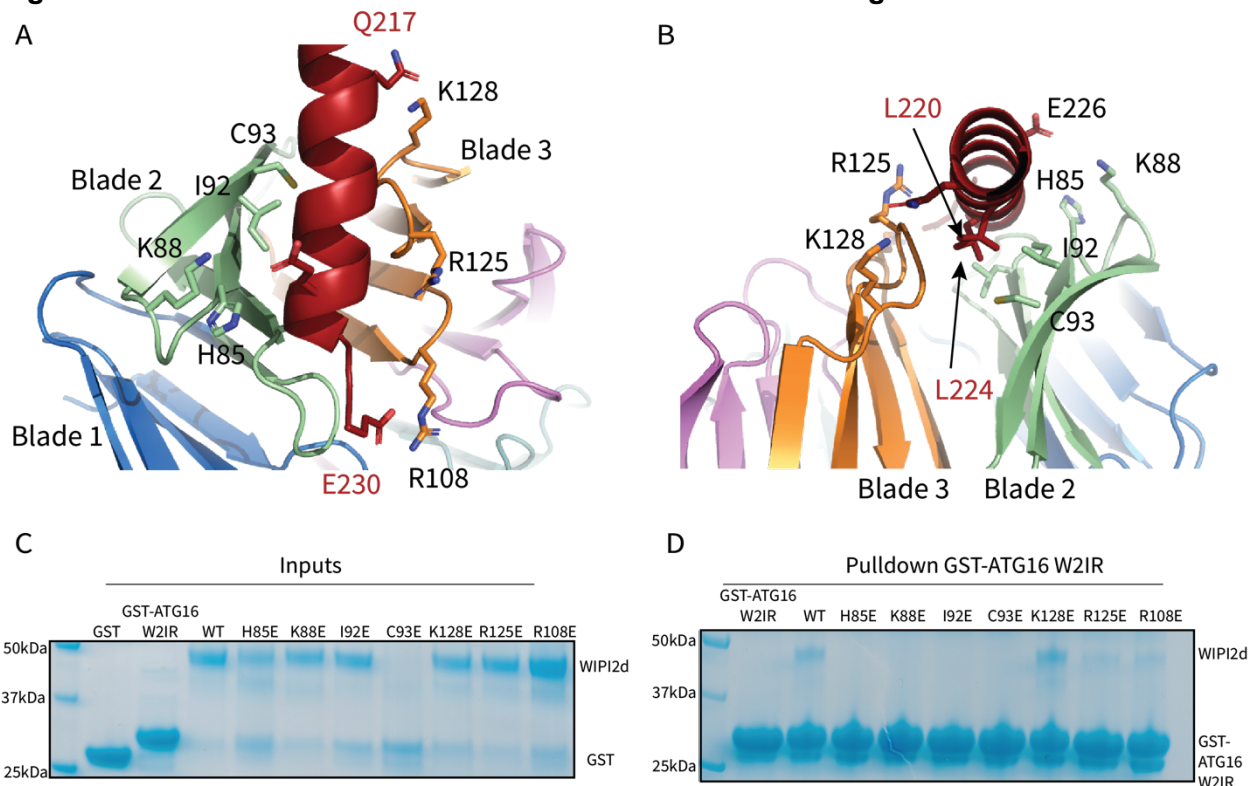

597  
598 **Figure 3: Key interacting residues shown as sticks in cartoon representation of WIPI2d:**  
599 **ATG16L1 interface shown from A) the WIPI2d face or B) down the ATG16L1 helix. C) Pull-down**  
600 **assays of mutant WIPI2d constructs and wild type with GST-ATG16L1 W2IR. GSH resin was**  
601 **used to pull down GST-ATG16L1 W2IR from purified protein mixture. The pull-down results**  
602 **were visualized by SDS-PAGE and Coomassie blue staining.**

603 **Figure 4: WIPI2d mutants disrupt E3 recruitment and LC3 lipidation on GUVs**

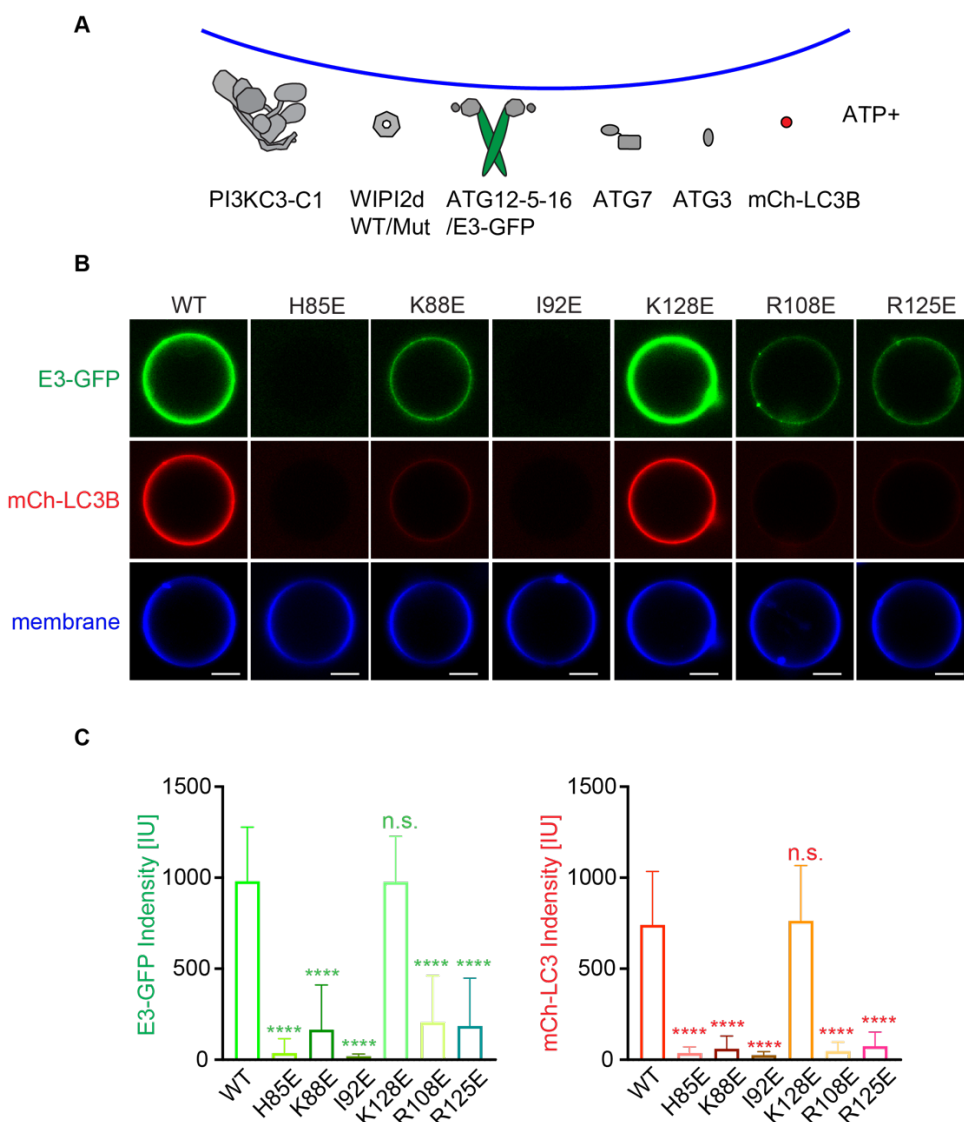

604  
 605 A) The schematic drawing illustrates the reaction setting. Colors indicate fluorescent protein  
 606 fused components. Components in gray are not labeled but are present in the reaction. B)  
 607 Representative confocal images of GUVs showing E3 membrane binding and LC3B lipidation.  
 608 PI3KC3-C1, WIPI2d WT or mutant, E3-GFP, ATG7, ATG3, mCherry-LC3B and ATP/Mn<sup>2+</sup> were  
 609 incubated with GUVs (64.8% DOPC: 20% DOPE: 5% DOPS: 10% POPI: 0.2% Atto647 DOPE)  
 610 at room temperature. Images taken at 30 min were shown. Scale bars, 10  $\mu$ m.  
 611 C) Quantification of relative intensities of E3-GFP and mCherry-LC3B on GUV membranes in  
 612 (A) (means  $\pm$  SDs are shown; N = 40).  $p \geq 0.5$ : (ns);  $0.01 < p < 0.05$ : (\*);  $0.001 < p < 0.01$ : (\*\*);  
 613  $p < 0.001$  (\*\*\*);  $p < 0.0001$  (\*\*\*\*).

614 **Figure 5: Altering the electrostatic interface of WIPI2 impairs starvation-induced**  
 615 **autophagy in MEFs.**

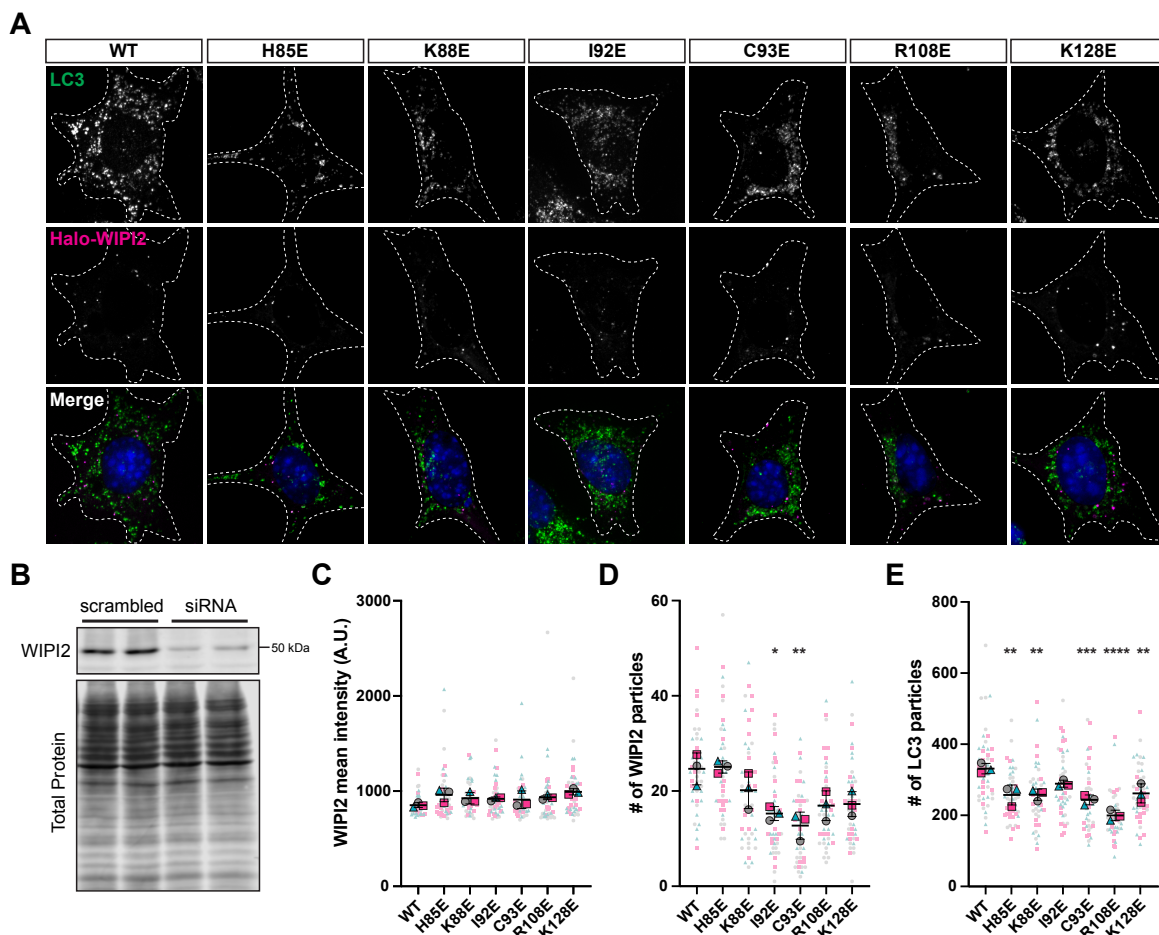

616 **Figure 5.** A) Representative maximal projections of LC3 staining and Halo-WIPI2 signal in  
 617 MEFs following induction of autophagy via 2-hour starvation in EBSS in the presence of 100 nM  
 618 BafA. Endogenous WIPI2 was depleted by siRNA and cells were transfected with Halo-WIPI2  
 619 WT, H85E, K88E, I92E, C93E, R108E, or K128E. B) Immunoblot of MEF lysates treated with  
 620 indicated siRNA, collected 48 hours after siRNA transfection. C-E) Quantification of C) the mean  
 621 fluorescence intensity of Halo-WIPI2, D) Halo-WIPI2 particle number, and E) LC3 particle  
 622 number in EBSS + BafA starved MEFs, depleted of endogenous WIPI2 and expressing siRNA-  
 623 resistant WT or mutant Halo-WIPI2. Independent experimental replicates are color-coded, with  
 624 individual data points in light colors and averages of three independent repeats in bold colors  
 625 (mean  $\pm$  SEM; n = 3 independent experiments; \*, p < 0.05; \*\*, p < 0.01; \*\*\*, p < 0.001; \*\*\*\*, p <  
 626 0.0001 between WIPI2 point mutants and WIPI2 WT by one-way ANOVA with Tukey's multiple  
 627 comparisons test).  
 628  
 629



630 **Figure 6: WIPI2d Mutants Membrane Affinity**

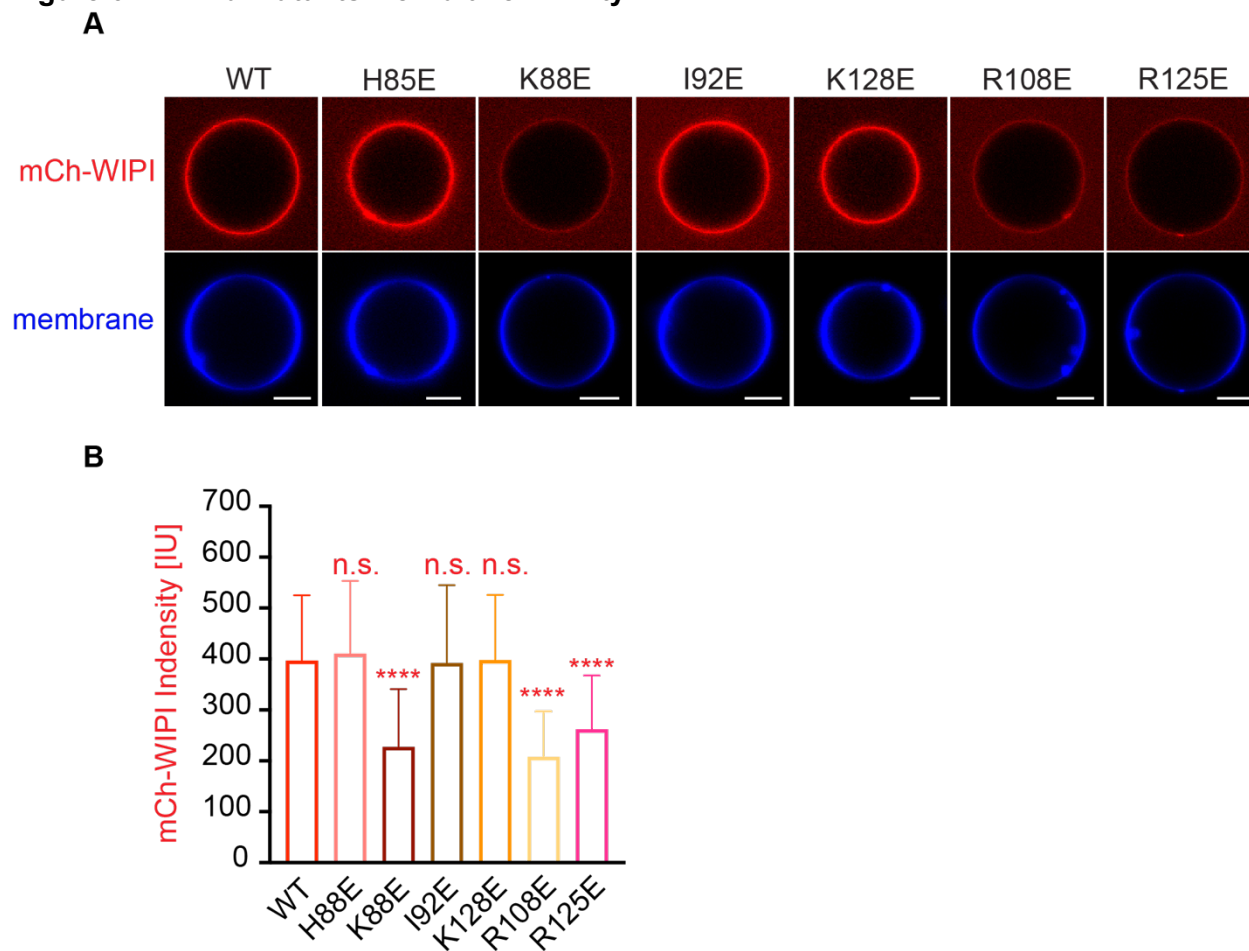

631 A) Representative confocal images of GUVs showing membrane binding of mCherry-WIPI2d.  
632 PI3KC3-C1, mCherry-WIPI2d WT or mutant, E3-GFP were incubated with GUVs (64.8% DOPC:  
633 20% DOPE: 5% DOPS: 10% POPI: 0.2% Atto647 DOPE) at room temperature. Images taken at  
634 30 min were shown. Scale bars, 10  $\mu$ m. B) Quantification of relative intensities of mCherry-  
635 WIPI2d on GUV membranes in (A) (means  $\pm$  SDs are shown; N = 40).  $p \geq 0.5$ : (ns);  $0.01 < p < 0.05$ :  
636 (\*);  $0.001 < p < 0.01$ : (\*\*);  $p < 0.001$  (\*\*\*);  $p < 0.0001$  (\*\*\*\*).  
637  
638  
639

640 **Figure 7: Comparing WIPI2d and WIPI3 structures and binding modes**

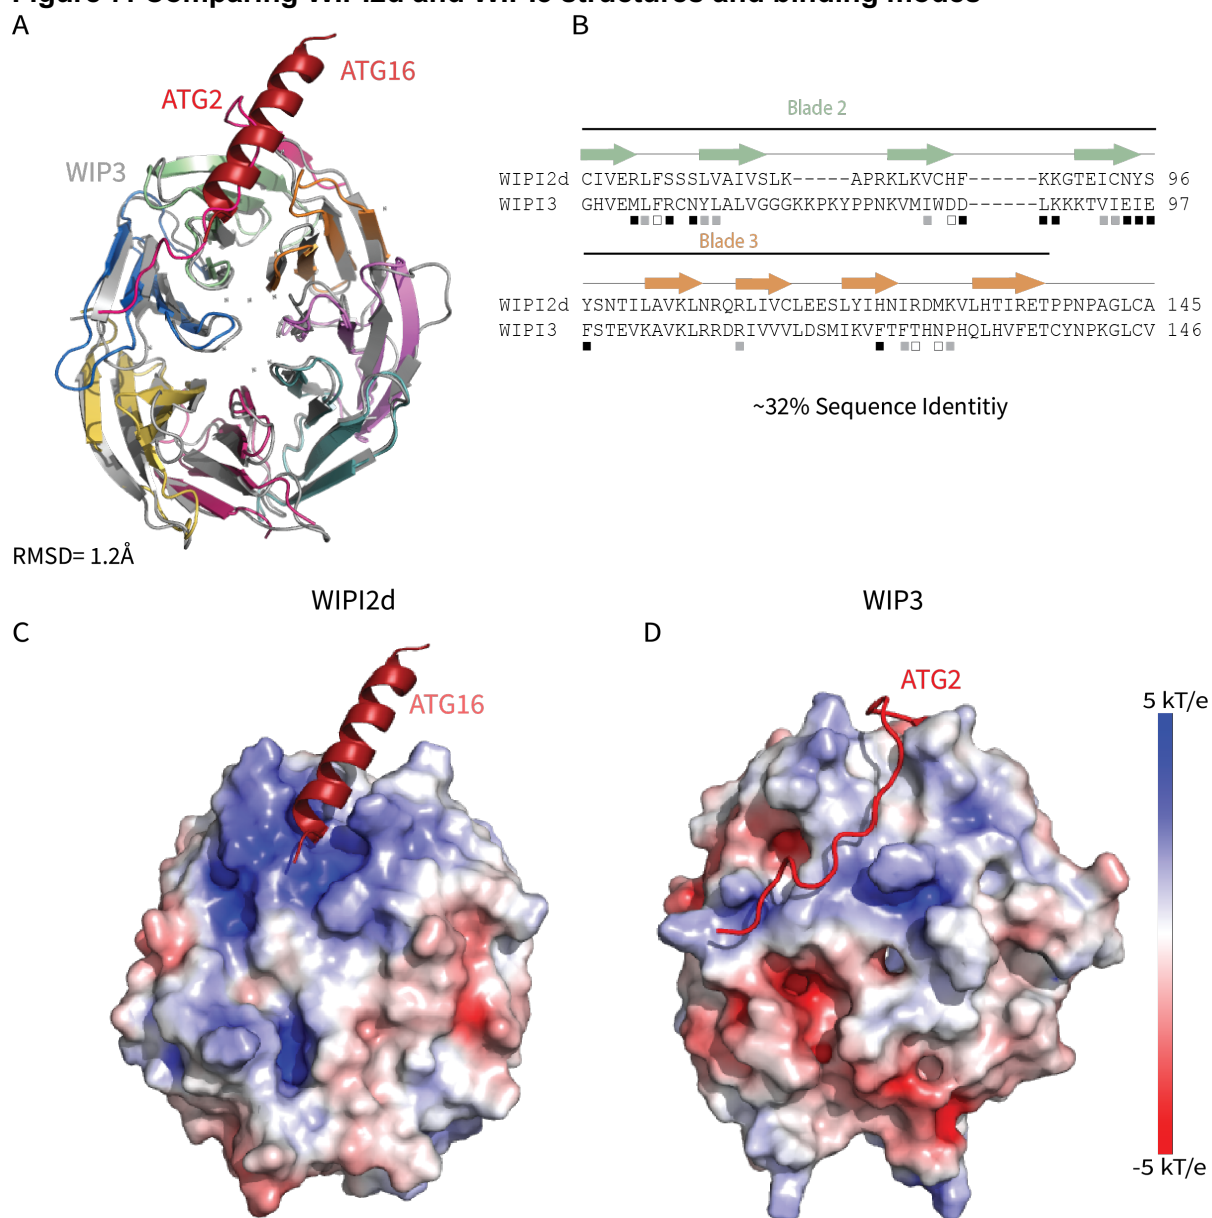

641  
642 Figure 7: Comparison of WIPI2d and WIPI3. Alignment of WIPI2d and WIPI3 A) structure and  
643 B) sequence based on structures with W2IR residues denoted with white squares, W34IR with  
644 black, and from both with grey. Electrostatic surface comparison of C) WIPI2d and D) WIPI3.

645 **Figure 8: WIPI1-4 comparison**

646

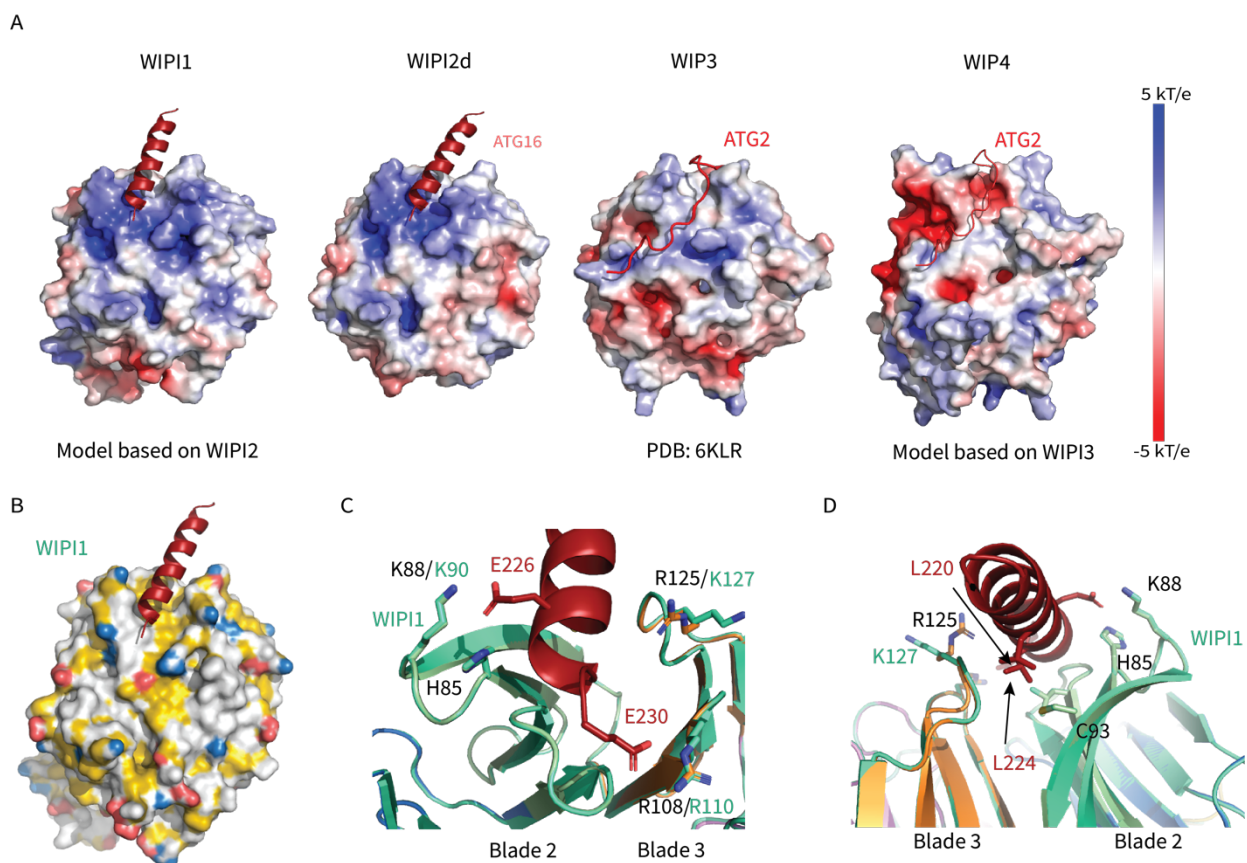

647

648 Figure 8: Comparison of electrostatic surface potential of A) WIPI1-4. B) Hydrophobic surface of  
649 WIPI1 with predicted ATG16L1 W2IR shown as cartoon. C & D) Alignment of WIPI2d crystal  
650 structure and WIPI1 homology structure with WIPI1 shown as light green and key residues labelled  
651 in the same color as structure.

652 **Figure 9: Model of WIPI2 recruitment of ATG16 to the membrane**

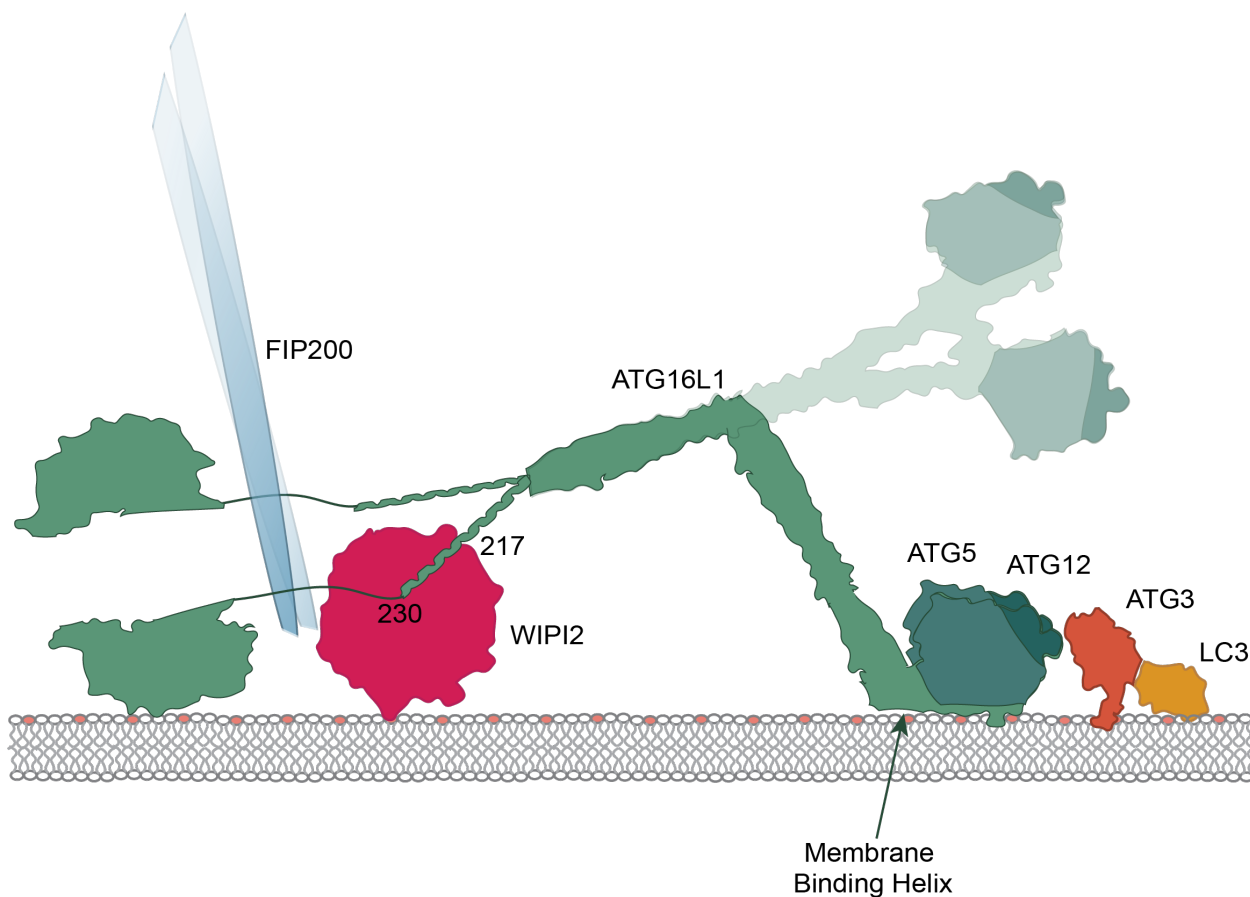

653  
654 Figure 9: Cartoon model of ATG16 positioning on the membrane while bound to WIPI2 and  
655 performing LC3 lipidation. Helix 1 membrane binding is labelled (Lystad et al., 2019), and a  
656 secondary upwards conformation is shown in faded colors. Rab33b binding is pictured.

657 **Supplementary Table 1. Data collection and refinement statistics.**

|                                   | <b>WIPI2d</b>               |
|-----------------------------------|-----------------------------|
| <b>Data Collection Statistics</b> |                             |
| Wavelength                        | 0.9794Å                     |
| Resolution range                  | 38.29 - 1.85 (1.916 - 1.85) |
| Space group                       | I 2                         |
| Unit cell                         | 117.8 49.1 120.1 90 95.9 90 |
| Total reflections                 | 126271                      |
| Unique reflections                | 55829 (1711)                |
| Multiplicity                      | 3.3                         |
| Completeness (%)                  | 97.6 (97.8)                 |
| Mean I/sigma(I)                   | 6.9 (2.7)                   |
| Wilson B-factor                   | 18                          |
| R-merge                           | 0.05 (0.031)                |
| R-meas                            | 0.098                       |
| R-pim                             | 0.068                       |
| CC1/2                             | 0.996                       |
| <b>Refinement statistics</b>      |                             |
| Reflections used in refinement    | 55472 (5022)                |
| Reflections used for R-free       | 885 (85)                    |
| R-work                            | 0.1830 (0.2570)             |
| R-free                            | 0.2188 (0.3225)             |
| Number of non-hydrogen atoms      | 5666                        |
| macromolecules                    | 5041                        |
| solvent                           | 625                         |
| Protein residues                  | 658                         |
| RMS(bonds)                        | 0.007                       |
| RMS(angles)                       | 0.97                        |
| Ramachandran favored (%)          | 97.99                       |
| Ramachandran allowed (%)          | 2.01                        |
| Ramachandran outliers (%)         | 0                           |
| Rotamer outliers (%)              | 1.83                        |
| Clashscore                        | 4.15                        |
| Average B-factor                  | 25.37                       |
| macromolecules                    | 24.26                       |
| solvent                           | 34.32                       |

658 \*Statistics for the highest-resolution shell are shown in parentheses.

659

660 **Supplementary Table 2: Oligos used for cloning**

| Lab Numbering | Sequence                                                      | Purpose                                              |
|---------------|---------------------------------------------------------------|------------------------------------------------------|
| 165           | GCTGTGAAGCTCAACGAGCAGAGGCTGATAG                               | WIPI2d R108E cloning                                 |
| 166           | CTATCAGCCTCTGCTCGTTGAGCTTCACAGC                               | WIPI2d R108E cloning                                 |
| 167           | GTACATCCACAACATTGAGGACATGAAGGTGCTGC                           | WIPI2d R125E cloning                                 |
| 168           | GCAGCACCTTCATGTCCTCAATGTTGTGGATGTAC                           | WIPI2d R125E cloning                                 |
| 169           | GATTGTTCTCCAGCAGCGAAGTGGCCATCGTGAGC                           | WIPI2d L69E cloning                                  |
| 170           | GCTCACGATGGCCACTTCGCTGCTGGAGAACAATC                           | WIPI2d L69E cloning                                  |
| 171           | CAAGGAAGCTAAAGGTTTGCGAATTTAAGAAGGGA<br>ACT GAGATC             | WIPI2d H85E cloning                                  |
| 172           | GATCTCAGTTCCTTCTTAAATTCGCAAACCTTTAGCTTC<br>CTTG               | WIPI2d H85E cloning                                  |
| 173           | GTTTGCCACTTTAAGGAGGGA<br>ACTGAGATC                            | K88E cloning                                         |
| 174           | GATCTCAGTTCCTCCTTAAAGTGGCAAAC                                 | K88E cloning                                         |
| 175           | GAAGGGA<br>ACTGAGATCGAAACTACAGCTACTCC                         | C93E cloning                                         |
| 176           | GGAGTAGCTGTAGTTTTCGATCTCAGTTCCTTC                             | C93E cloning                                         |
| 177           | CTTTAAGAAGGGA<br>ACTGAGGAATGCAACTACAGCTACT<br>CC              | I92E cloning                                         |
| 178           | GGAGTAGCTGTAGTTGCATTCCTCAGTTCCTTCTTAA<br>AG                   | I92E cloning                                         |
| 179           | CATTCGGGACATGGAGGTGCTGCATAC                                   | K128E cloning                                        |
| 180           | GTATGCAGCACCTCCATGTCCCGAATG                                   | K128E cloning                                        |
| 98            | CAA ACT CGA GAC TGT GGG ATC GGG ATC GTT CAA<br>CCA GGG CAG AG | loop del (263-295, GS linker) in WIPI2d pCAG cloning |
| 99            | CTC TGC CCT GGT TGA ACG ATC CCG ATC CCA CAG<br>TCT CGA GTT TG | loop del (263-295, GS linker) in WIPI2d pCAG cloning |
| 75            | GAA TTC CTC GAT CGA CGG TAT CGA TGC                           | WIPI2d pCAG backbone forward cloning                 |
| 76            | GTT AAT TAA TTA AGA TAT CAC CCG GGT C                         | WIPI2d pCAG backbone reverse cloning                 |

661

662

663
